# Supplementary material for: Exploring Simultaneous Upgrading and Purification of Biomass−Gasified Gases Using Plasma Catalysis
Source: MDPI journal article supplement (doi:10.3390/catal13040686), 2023-03-31
Supplement: s1 [file s1]

# Exploring Simultaneous Upgrading and Purification of Biomass–Gasified Gases Using Plasma Catalysis

Pages: 9; Tables: 4; Figures: 6

**Figure S1.** XRD analyses of the La–Ni/ $\gamma$ - $\text{Al}_2\text{O}_3$  catalyst calcined at 600 °C.

**Figure S2.** TEM analysis and particle size distributions for fresh catalyst and spent catalysts after 2 h reaction at 330 °C and 450 °C.

**Figure S3.** (a) FTIR spectra, (b–e) C 1 s spectra and relative contents of functional groups for spent catalysts under different conditions, and (f) La 3d spectra and (g) Ni 2p spectra for spent catalyst under MRO at 450 °C.

**Table S1.** Relative contents of the peaks of the spent catalysts.

**Table S2.**  $\text{H}_2$  molar flow from plasma–coupled catalytic processes.

**Table S3.** Catalyst characterization data.

**Figure S4.** (a, b)  $\text{N}_2$  adsorption–desorption isotherms and (c, d) BJH pore width distributions for fresh and spent catalysts.

**Figure S5.** GC–MS spectrogram of benzene removal under a gas mixture ( $\text{N}_2$ ,  $\text{CH}_4$  and  $\text{CO}_2$ ) atmosphere and a pure  $\text{N}_2$  atmosphere.

**Table S4.** Main products identified in the liquid sample by GC–MS.

**Figure S6.** Schematic diagram of the experimental setup.

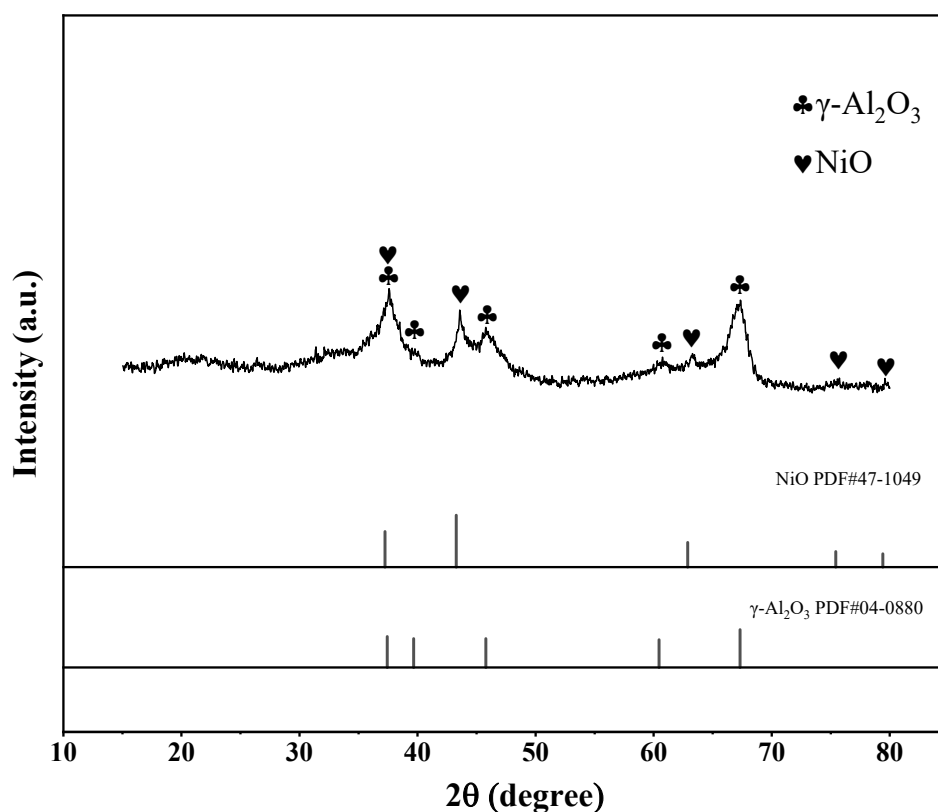

**Figure S1.** XRD analyses of the La–Ni/ $\gamma$ - $\text{Al}_2\text{O}_3$  catalyst calcined at 600 °C.

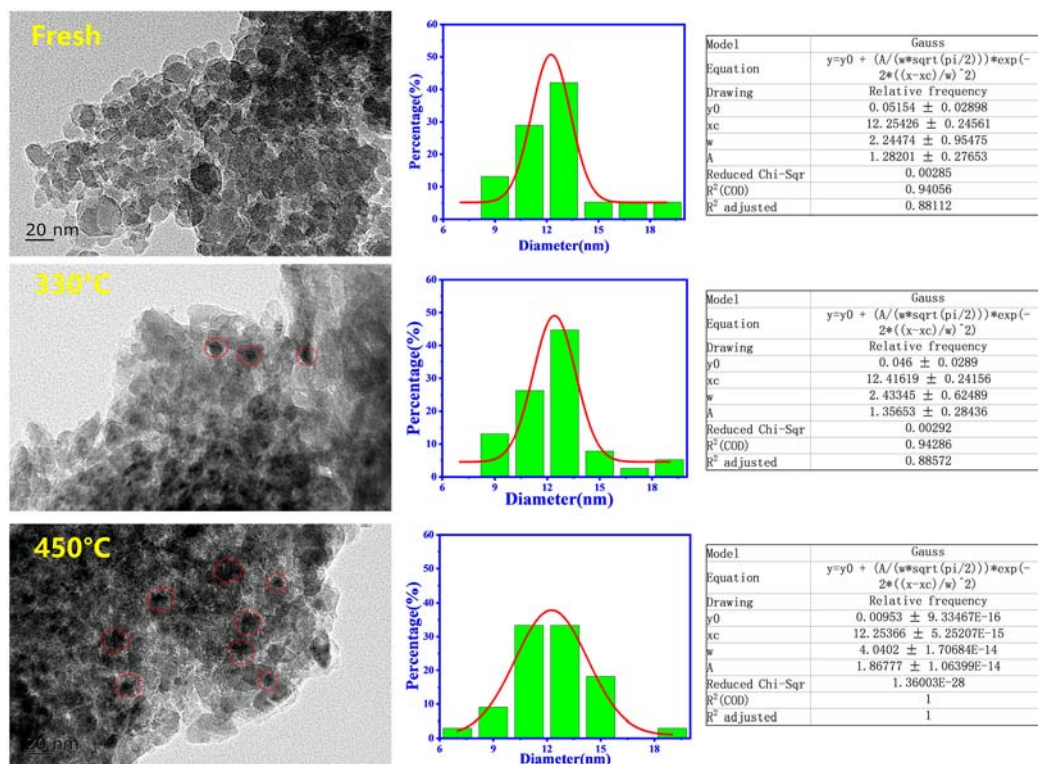

**Figure S2.** TEM analysis and particle size distributions for fresh catalyst and spent catalysts after 2 h reaction at 330 °C and 450 °C.

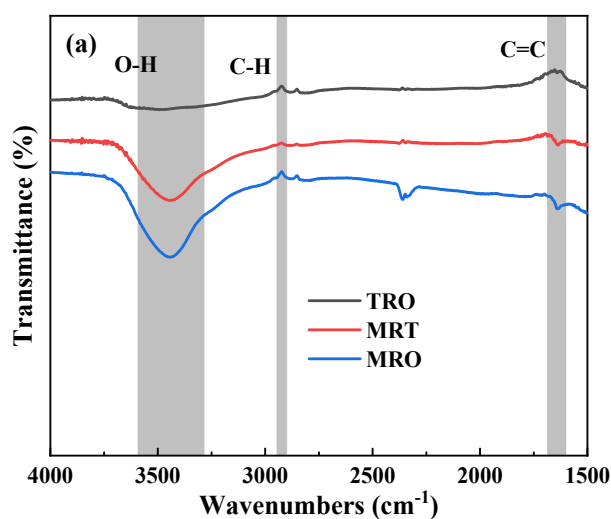

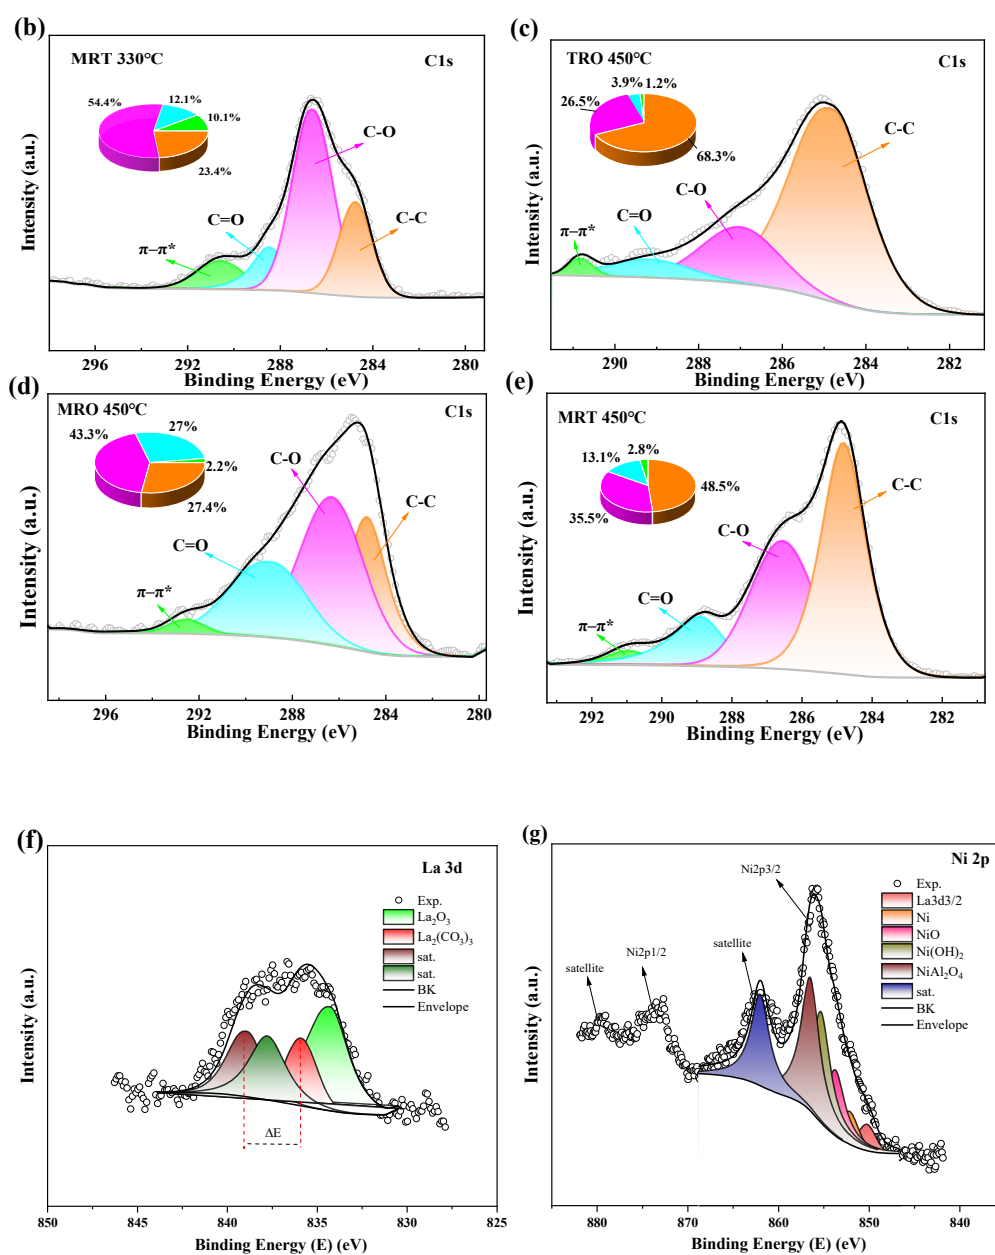

**Figure S3.** (a) FTIR spectra, (b–e) C 1 s spectra and relative contents of functional groups for spent catalysts under different conditions, and (f) La 3d spectra and (g) Ni 2p spectra for spent catalyst under MRO at 450 °C.

**Table S1.** Relative contents of the peaks of the spent catalysts.

| Samples | C-C (%) | C-O (%) | C=O (%) | O content (%) | $\pi-\pi^*$ (%) |
|---------|---------|---------|---------|---------------|-----------------|
| MRT-330 | 23.4    | 54.4    | 12.1    | 66.5          | 10.1            |
| MRT-450 | 48.5    | 35.5    | 13.1    | 48.6          | 2.8             |
| MRO-450 | 27.4    | 43.3    | 27.0    | 70.3          | 2.2             |
| TRO-450 | 68.3    | 26.5    | 3.9     | 30.4          | 1.2             |

**Table S2.** H<sub>2</sub> molar flow from plasma-catalytic processes.

| Process | Units    | Temperature (°C) |      |      |
|---------|----------|------------------|------|------|
|         |          | 250              | 288  | 330  |
| MRT     | mmol/min | 0.56             | 0.38 | 0.43 |
| MRO     | mmol/min | 0.89             | 0.95 | 1.05 |
| TRO     | mmol/min | 0.09             | 0.11 | 0.12 |

**Table S3.** Catalyst characterization data.

| Catalyst                               | BET specific surface area<br>(m <sup>2</sup> ·g <sup>-1</sup> ) | Total pore volume<br>(cm <sup>3</sup> ·g <sup>-1</sup> ) | Average pore size<br>(nm) |
|----------------------------------------|-----------------------------------------------------------------|----------------------------------------------------------|---------------------------|
| γ-Al <sub>2</sub> O <sub>3</sub>       | 110.3                                                           | 0.26                                                     | 9.35                      |
| Ni/γ-Al <sub>2</sub> O <sub>3</sub>    | 99.1                                                            | 0.23                                                     | 9.35                      |
| La-Ni/γ-Al <sub>2</sub> O <sub>3</sub> | 97.4                                                            | 0.23                                                     | 9.45                      |
| MRT                                    | 96.5                                                            | 0.21                                                     | 8.87                      |
| TRO                                    | 95.9                                                            | 0.21                                                     | 8.94                      |
| MRO                                    | 95.7                                                            | 0.22                                                     | 9.18                      |

(MRT = Methane dry reforming with tar addition, MRO = Methane dry reforming-only, TRO = Tar removal-only) (Temperature: 450 °C, discharge power: 35 W, CO<sub>2</sub>/CH<sub>4</sub> ratio: 1, total flow rate: 300 ml/min, tar concentration: 29.6 g/Nm<sup>3</sup>, catalyst: 2%La-10%Ni/γ-Al<sub>2</sub>O<sub>3</sub>).

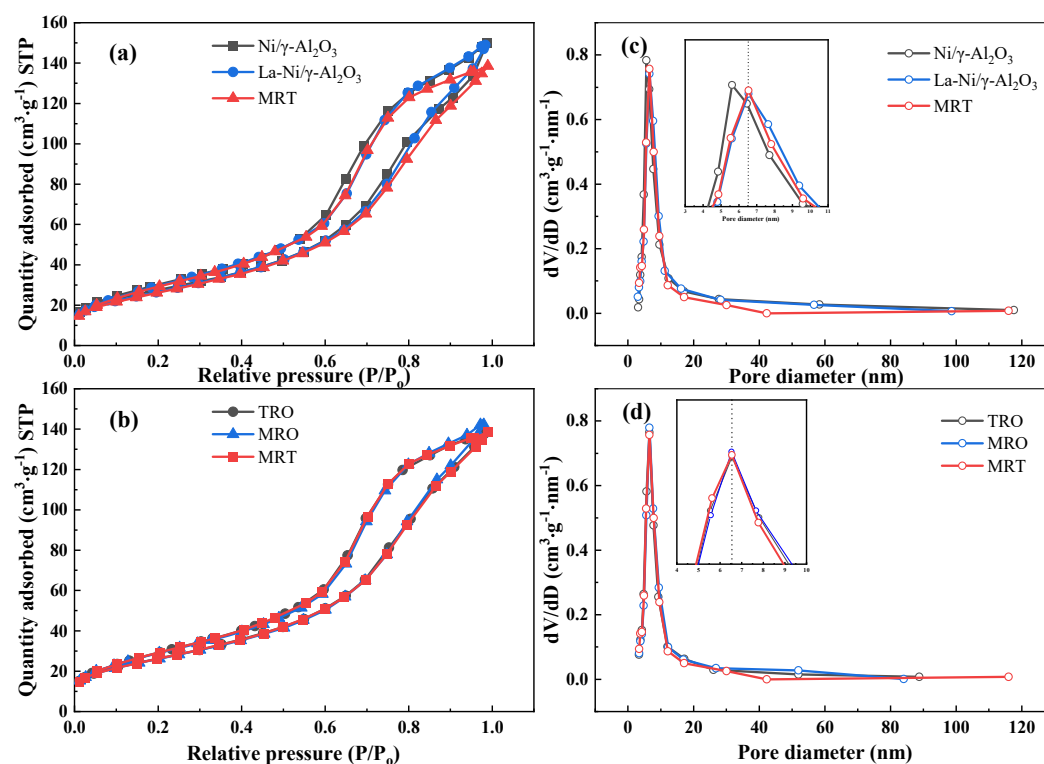**Figure S4.** (a, b) N<sub>2</sub> adsorption-desorption isotherms and (c, d) BJH pore width distributions for fresh and spent catalysts.

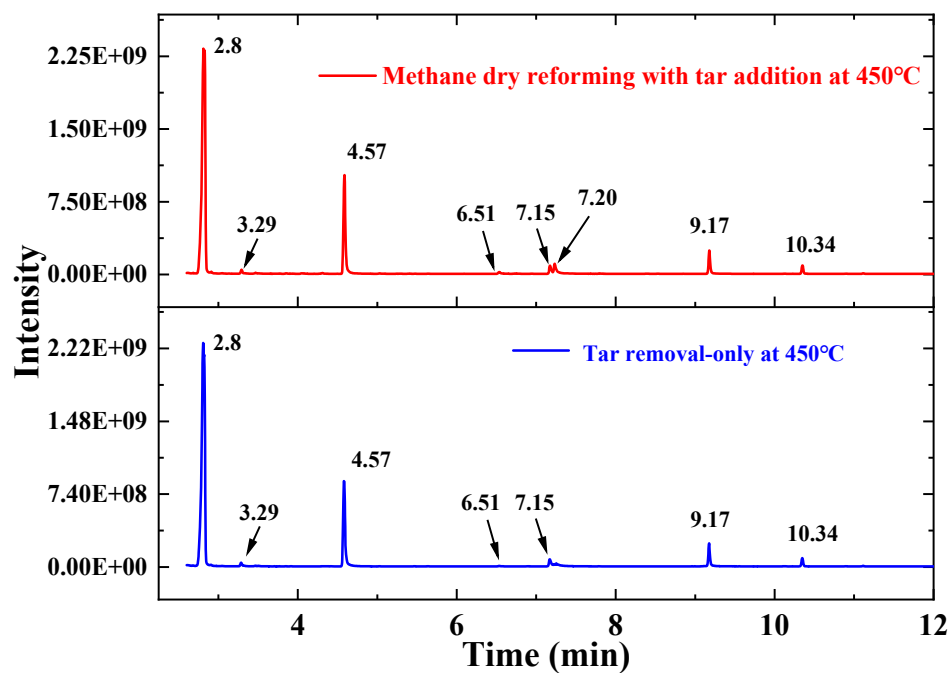

**Figure S5.** GC–MS spectrogram of benzene removal under a gas mixture ( $\text{N}_2$ ,  $\text{CH}_4$  and  $\text{CO}_2$ ) atmosphere and a pure  $\text{N}_2$  atmosphere.

**Table S4.** Main products identified in the liquid sample by GC–MS.

| No. | R.T.(min) | M.W. | Formula                             | Compounds name               | Structure | Peak Area (%) |       |
|-----|-----------|------|-------------------------------------|------------------------------|-----------|---------------|-------|
|     |           |      |                                     |                              |           | MRT           | TRO   |
| 1   | 2.8       | 78   | $\text{C}_6\text{H}_6$              | Benzene                      |           | 71.68         | 73.28 |
| 2   | 3.29      | 100  | $\text{C}_7\text{H}_{16}$           | Heptane                      |           | 0.61          | 0.62  |
| 3   | 4.57      | 92   | $\text{C}_7\text{H}_8$              | Toluene                      |           | 18.05         | 16.86 |
| 4   | 6.51      | 106  | $\text{C}_8\text{H}_{10}$           | Ethylbenzene                 |           | 0.44          | 0.13  |
| 5   | 7.15      | 104  | $\text{C}_8\text{H}_8$              | Styrene                      |           | 1.6           | 1.47  |
| 6   | 7.20      | 128  | $\text{C}_7\text{H}_{12}\text{O}_2$ | 2-Propenoic acid, butylester |           | 1.9           | /     |
| 7   | 9.17      | 142  | $\text{C}_{10}\text{H}_{22}$        | Decane                       |           | 3.66          | 3.85  |
| 8   | 10.34     | 138  | $\text{C}_{10}\text{H}_{18}$        | trans-Decalin                |           | 1.37          | 1.38  |

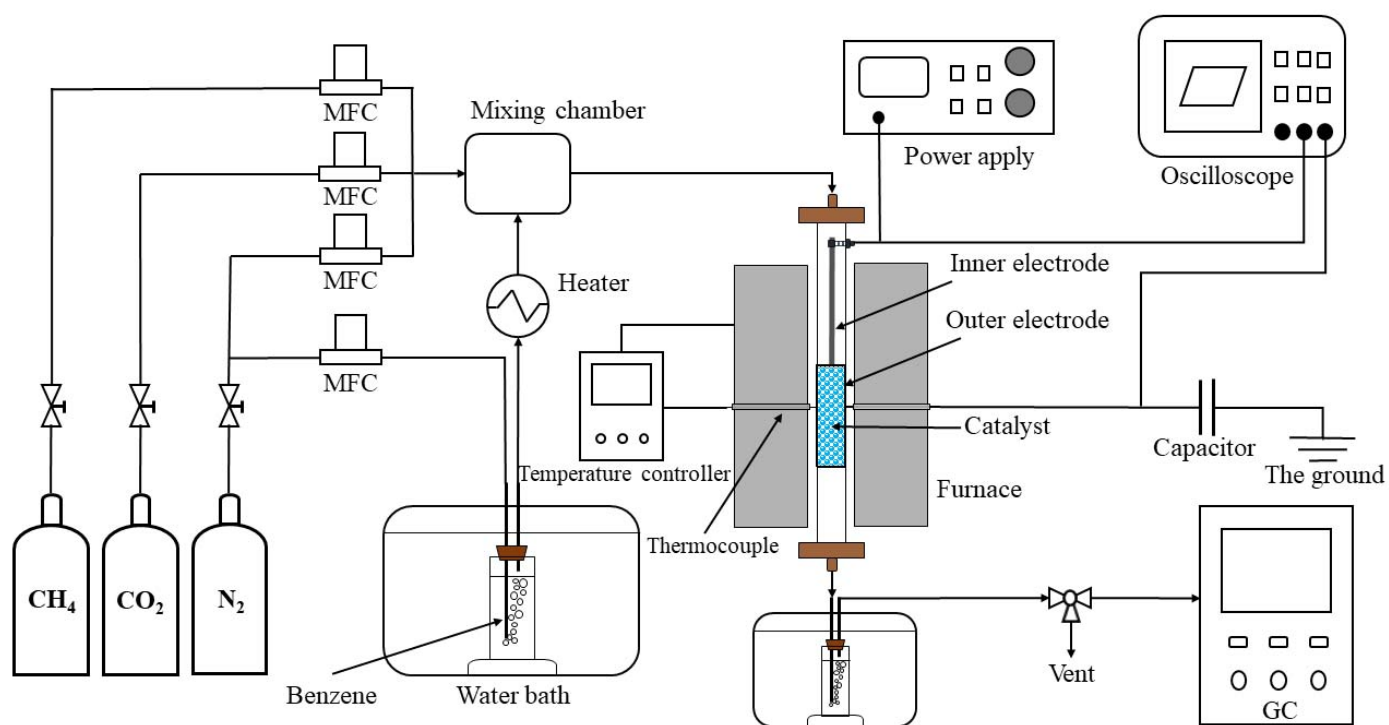

**Figure S6.** Schematic diagram of the experimental setup.
